# Supplementary material for: A dynamic fluorescence probed glycolysis suppression process in HeLa cells treated with trichostatin A
Source: Royal Society of Chemistry journal article supplement (doi:10.1039/d2an01114j), 2022-01-01
Supplement: d2an01114j1.pdf [file d2an01114j1.pdf]

## Supporting Information

### Dynamic fluorescence probing glycolysis suppression process in the HeLa cells treated with Trichostatin A

Fengqiu Zhang,<sup>†a,b</sup> Changsheng Shao,<sup>†b,c</sup> Yahui Wu,<sup>b,c</sup> Wei Zhao,<sup>a</sup> Xumiao Jing,<sup>a</sup> Cao Fang<sup>b,c</sup> and Qing Huang<sup>\*b,c</sup>

<sup>a</sup> Henan Key Laboratory of Ion-beam Bioengineering, School of Physics and Microelectronics, Zhengzhou University, Zhengzhou, China.

<sup>b</sup> CAS Key Laboratory of High Magnetic Field and Ion Beam Physical Biology, Institute of Intelligent Machines, Hefei Institutes of Physical Sciences, Chinese Academy of Sciences, Hefei, China.

<sup>c</sup> Science Island Branch of Graduate School, University of Science & Technology of China, Hefei, China.

<sup>†</sup> These authors contributed equally to this work.

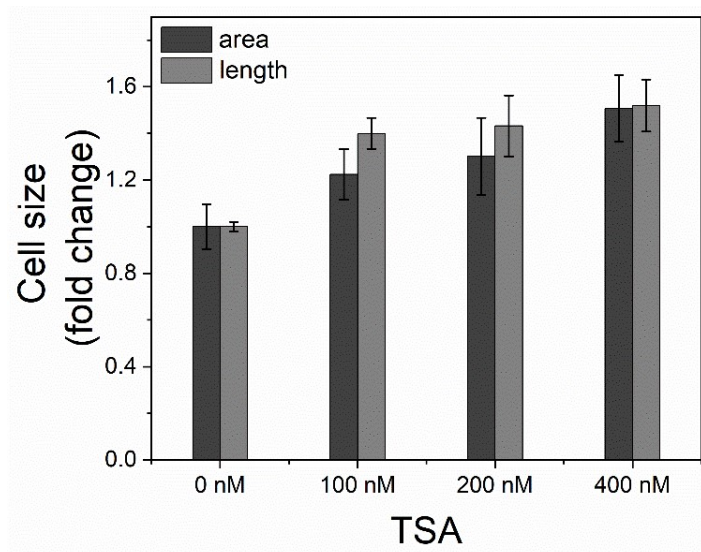

Fig. S1 Morphological changes of HeLa cells treated with TSA

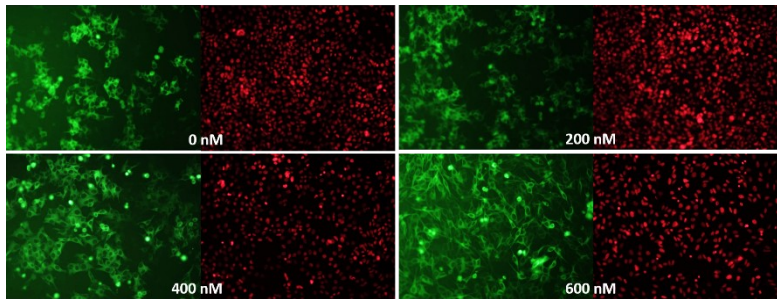

Fig. S2 Fluorescence imaging of HeLa cells treated with TSA. GFP was labeled on  $\alpha$ -tubulin, RFP (red fluorescence protein) was labeled on histone H2B.

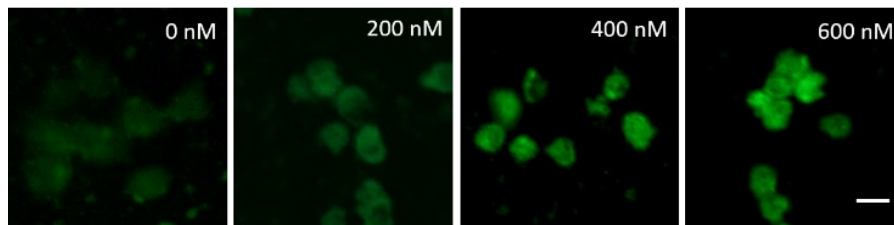

Fig. S3 Fluorescence imaging of GFP-actin-HeLa cells treated with TSA for 48 h. The scale bar is 20  $\mu$ m.
